# Supplementary material
Source: publisher figshare collection journal article supplement (https://tandf.figshare.com/ndownloader/files/14102105)
Supplement: Supplementary file 1 [file 14102105]

**Appendix 1. Best layouts for the DFCAP of a size within the range of [9, 40], obtained via the IFPA/FPA.**

| Instance | Cost | Permutations of the departments | *u* | *n*u1 | *n*u2 |
| --- | --- | --- | --- | --- | --- |
| S9 | 1925.5 | [3-2-9-5-8-6-7-1-4] | 2 | 1 | 3 |
| S9H | 3995.5 | [5-3-9-4-8-7-1-6-2] | 2 | 1 | 3 |
| S10 | 2139.5 | [3-9-7-5-4-8-1-10-2-6] | 2 | 1 | 4 |
| S11 | 5202.5 | [9-7-2-5-6-11-10-1-4-3-8] | 2 | 1 | 4 |
| Am12a | 2210.0 | [1-7-3-4-5-8-12-11-2-10-6-9] | 2 | 1 | 4 |
| Am12b | 2494.5 | [11-1-9-8-5-7-10-4-6-2-12-3] | 2 | 1 | 4 |
| Am13a | 3456.5 | [4-13-1-7-6-9-8-3-2-12-11-5-10] | 2 | 1 | 4 |
| Am13b | 3784.0 | [13-8-4-12-11-7-1-2-3-5-6-9-10] | 2 | 1 | 4 |
| Am15 | 4262.0 | [1-2-9-8-7-5-6-15-13-11-12-14-4-3-10] | 2 | 1 | 6 |
| Am17 | 5904.0 | [13-9-3-16-11-8-15-1-6-10-14-2-4-12-7-5-17] | 2 | 1 | 6 |
| Am18 | 6706.5 | [13-9-6-10-5-16-11-12-7-1-3-18-14-2-4-8-15-17] | 2 | 1 | 8 |
| H20 | 9427.0 | [3-9-18-19-15-8-20-6-13-17-10-14-2-16-4-11-12-7-5-1] | 2 | 1 | 8 |
| N25_01 | 3327.0 | [2-5-24-12-25-11-8-9-16-21-20-22-15-18-17-4-3-14-23-6-7-10-19-1-13] | 2 | 1 | 11 |
| N25_02 | 19741.5 | [12-13-23-14-3-7-19-16-25-9-2-1-5-17-4-20-10-24-21-6-8-15-22-11-18] | 2 | 1 | 11 |
| N25_03 | 13241.0 | [13-15-20-10-19-7-6-21-24-11-16-18-22-9-1-23-8-14-17-4-25-2-5-3-12] | 2 | 1 | 10 |
| N25_04 | 25356.5 | [12-13-23-14-3-10-19-6-9-1-5-17-4-20-7-24-21-16-8-25-15-22-11-2-18] | 2 | 1 | 9 |
| N25_05 | 8938.0 | [13-12-23-14-3-10-24-21-6-8-9-11-18-17-4-20-7-19-16-25-15-22-2-1-5] | 2 | 1 | 11 |
| N30_01 | 5514.0 | [5-15-26-24-12-6-13-10-9-25-16-2-29-21-20-28-17-1-23-18-22-11-7-8-27-30-19-3-14-4] | 2 | 1 | 14 |
| N30_02 | 12211.5 | [15-17-24-12-6-1-22-7-8-19-21-5-23-18-3-26-10-13-25-11-28-9-16-30-4-2-29-14-27-20] | 2 | 1 | 13 |
| N30_03 | 24107.0 | [15-5-17-12-24-1-10-7-29-19-8-27-21-20-23-6-26-18-22-13-9-11-25-2-4-16-30-3-28-14] | 2 | 1 | 12 |
| N30_04 | 30010.5 | [15-26-24-1-23-22-12-5-7-19-14-4-30-20-17-18-10-6-13-2-9-21-3-8-16-25-29-11-27-28] | 2 | 1 | 12 |
| N30_05 | 59124.0 | [14-4-9-16-20-25-27-10-7-18-5-26-6-12-24-29-28-21-13-2-30-3-19-11-8-23-17-22-1-15] | 2 | 1 | 13 |
| P3 | 37955.5 | [5-15-2-22-33-6-13-9-21-18-3-29-14-20-31-28-27-26-17-24-1-12-10-32-7-23-11-19-30-16-25-8-4] | 2 | 1 | 15 |
| P6 | 37811.5 | [5-2-12-24-26-17-15-18-10-9-23-31-27-16-29-20-14-4-32-35-6-33-1-22-13-21-7-34-3-11-25-30-19-8-28] | 2 | 1 | 16 |
| ste36_01 | 6200.0 | [35-36-17-2-18-8-10-1-5-6-20-27-23-19-32-34-33-21-22-16-3-15-9-7-4-13-12-11-14-28-29-30-31-26-25-24] | 2 | 1 | 17 |
| ste36_02 | 89630.0 | [35-36-3-16-2-10-1-9-5-6-11-20-27-28-32-33-22-21-26-17-15-18-8-7-4-13-12-14-23-19-29-30-34-31-25-24] | 2 | 1 | 17 |
| ste36_03 | 51921.5 | [17-35-36-18-9-3-1-5-11-6-27-28-29-32-22-26-2-16-15-8-10-7-4-13-12-14-20-23-19-30-31-34-33-21-25-24] | 3 | 1 | 13 |
| ste36_04 | 48545.5 | [36-35-31-30-34-28-21-24-23-6-11-15-1-9-2-17-16-29-33-32-19-22-25-26-27-20-14-5-12-13-4-7-10-8-18-3] | 2 | 1 | 15 |
| ste36_05 | 46098.5 | [36-35-17-16-15-3-7-9-5-11-20-23-28-32-30-31-22-26-24-18-2-8-10-1-4-13-12-6-14-27-19-33-34-29-21-25] | 2 | 1 | 17 |
| N40_01 | 57089.5 | [10-34-27-19-9-37-5-15-38-2-40-7-32-22-3-31-29-4-1-16-20-12-28-17-8-21-35-24-36-18-33-11-25-26-6-30-23-14-39-13] | 2 | 1 | 18 |
| N40_02 | 51606.0 | [14-33-8-3-26-4-25-16-9-28-2-13-21-29-18-30-36-7-24-15-6-31-1-40-35-11-32-27-19-5-39-34-20-22-10-17-23-12-38-37] | 2 | 1 | 17 |
| N40_03 | 41744.5 | [24-19-35-27-30-21-36-40-23-8-16-33-10-38-29-9-12-4-13-39-7-22-34-32-20-37-26-6-3-2-5-18-28-31-15-1-25-11-14-17] | 2 | 1 | 18 |
| N40_04 | 40698.0 | [4-6-24-18-10-21-27-5-33-31-26-9-2-35-25-14-8-28-17-11-29-40-12-13-1-22-36-16-30-34-32-15-3-39-7-23-37-20-38-19] | 2 | 1 | 18 |
| N40_05 | 53939.0 | [21-12-23-9-2-27-36-26-6-18-35-10-4-40-7-8-11-17-29-24-5-32-1-33-20-19-14-28-30-37-38-39-34-15-16-13-25-31-22-3] | 2 | 1 | 16 |

**Appendix 2. Best layouts for the DFCAP with a size within the range of [42, 80], obtained via the IFPA/FPA.**

| Instance | Cost | Permutations of the departments | *u* | *n*u1 | *n*u2 |
| --- | --- | --- | --- | --- | --- |
| sko42_01 | 15328.0 | [25-41-8-6-34-7-5-3-1-38-21-37-24-20-4-33-16-39-30-36-22-23-29-11-42-17-12-32-18-40-15-9-26-14-35-19-10-31-27-2-28-13] | 2 | 1 | 20 |
| sko42_02 | 111091.5 | [8-1-11-24-41-21-7-23-16-30-33-20-27-39-32-4-10-9-13-31-14-22-6-25-34-3-38-36-5-37-29-40-28-26-12-19-18-42-35-2-15-17] | 2 | 1 | 19 |
| sko42_03 | 90720.5 | [16-29-19-27-2-5-12-6-36-39-3-23-26-13-28-37-24-38-33-1-8-22-10-42-41-11-17-7-34-25-20-30-18-35-31-14-40-15-4-9-21-32] | 2 | 1 | 20 |
| sko42_04 | 71624.0 | [8-16-22-24-23-36-25-37-5-27-28-19-26-20-17-31-13-14-15-33-4-1-7-41-6-3-21-38-39-30-2-18-10-42-11-32-12-34-35-40-9-29] | 2 | 1 | 19 |
| sko42_05 | 126843.5 | [8-23-6-28-36-16-3-1-24-33-27-41-19-7-11-20-12-29-17-40-9-13-30-2-5-39-37-38-22-21-25-18-10-42-34-35-26-14-31-15-4-32] | 2 | 1 | 20 |
| sko49_01 | 23686.0 | [46-28-39-20-43-27-45-29-18-37-34-2-6-11-12-40-48-49-31-3-23-16-21-22-44-47-13-14-38-1-41-42-35-10-9-15-25-7-36-26-24-33-5-8-30-32-19-17-4] | 2 | 1 | 23 |
| sko49_02 | 211593.0 | [46-39-2-45-12-34-6-27-18-48-49-31-26-40-22-23-11-4-17-16-3-30-36-25-29-37-43-10-9-38-14-41-35-1-47-20-13-24-44-33-8-7-5-32-15-21-42-19-28] | 2 | 1 | 22 |
| sko49_03 | 165792.0 | [46-39-2-45-43-34-6-27-18-48-49-31-23-40-24-11-16-17-3-30-36-25-29-37-12-10-9-38-14-41-35-1-47-13-20-44-26-33-8-22-4-7-5-32-15-21-42-19-28] | 2 | 1 | 20 |
| sko49_04 | 121765.5 | [13-47-37-10-41-3-27-45-1-34-20-43-6-23-31-5-25-11-16-30-49-33-22-40-14-9-35-15-12-29-38-46-42-18-2-48-28-39-8-26-36-19-4-21-24-7-32-17-44] | 2 | 1 | 22 |
| sko49_05 | 336663.0 | [22-17-44-4-19-24-21-39-5-8-31-49-48-2-35-18-34-9-13-41-27-38-42-12-11-36-30-26-25-16-40-32-3-23-33-7-6-28-46-29-20-15-10-37-45-14-1-43-47] | 2 | 1 | 21 |
| sko56_01 | 36134.0 | [19-39-3-40-52-18-44-13-42-9-30-23-48-12-5-32-37-34-11-7-8-56-4-2-46-15-25-21-31-49-10-35-47-41-51-14-36-29-33-17-27-20-28-1-50-53-22-55-24-38-6-45-26-54-16-43] | 2 | 1 | 27 |
| AKV60_01 | 742027.0 | [48-27-11-28-15-3-51-46-7-12-47-16-35-26-17-42-9-41-29-5-31-37-10-52-19-60-20-18-34-56-24-21-40-25-6-54-57-36-44-13-4-32-8-33-2-14-22-49-38-23-45-43-50-53-59-30-58-55-39-1] | 2 | 1 | 27 |
| AKV60_02 | 423744.0 | [20-11-44-57-19-2-4-48-49-47-38-60-55-6-52-17-18-46-25-37-21-32-31-42-9-29-41-10-35-22-8-23-12-3-7-27-16-58-26-51-59-43-39-54-45-1-36-24-5-56-28-33-40-34-14-15-30-50-13-53] | 2 | 1 | 26 |
| AKV60_03 | 325381.5 | [6-4-53-36-27-54-32-51-7-58-56-25-17-46-8-50-35-18-57-37-52-2-44-41-20-24-29-42-5-59-49-47-22-13-1-34-31-10-23-28-60-45-39-26-30-43-33-40-9-15-12-55-14-21-11-48-16-38-3-19] | 2 | 1 | 27 |
| AKV60_04 | 201045.0 | [13-12-43-34-4-38-49-48-51-30-54-42-60-8-58-27-35-2-3-5-40-17-6-11-33-22-44-39-55-19-20-25-41-1-28-9-52-32-47-37-26-29-16-18-15-14-50-45-53-59-46-23-21-56-36-24-7-10-57-31] | 2 | 1 | 29 |
| AKV60_05 | 160333.0 | [53-39-37-47-4-41-54-2-17-35-30-36-40-28-50-10-56-45-31-5-15-18-51-23-14-29-1-3-34-44-12-7-16-59-19-9-13-55-46-20-60-6-8-25-48-27-21-42-24-58-22-57-32-43-26-11-38-52-49-33] | 2 | 1 | 29 |
| AKV70_01 | 766630.0 | [37-50-39-29-17-48-46-34-66-7-59-58-12-11-27-21-13-23-55-42-33-19-10-70-67-38-64-4-51-9-15-22-62-2-47-35-57-43-25-45-3-20-52-6-54-24-18-60-36-30-5-49-14-26-44-56-41-61-16-1-68-69-31-63-32-8-40-28-65-53] | 2 | 1 | 33 |
| AKV70_02 | 722901.0 | [39-28-50-10-26-7-19-69-58-67-23-29-30-11-68-44-24-8-40-2-4-54-22-15-34-32-12-65-60-66-41-59-61-64-56-53-52-47-21-36-1-3-13-9-33-45-62-18-63-14-6-49-43-42-16-46-20-5-27-37-31-55-35-17-38-70-48-51-57-25] | 2 | 1 | 33 |
| AKV70_03 | 762900.5 | [8-30-51-27-21-32-23-1-6-9-11-22-65-61-70-42-37-10-53-25-56-39-40-60-55-48-58-38-15-69-34-31-52-16-63-54-29-43-20-24-41-47-67-26-4-7-19-2-68-50-14-49-28-18-66-5-36-3-35-62-45-13-12-59-46-33-64-17-57-44] | 2 | 1 | 32 |
| AKV70_04 | 486388.0 | [66-41-35-8-38-31-10-45-48-40-55-21-70-59-56-28-1-36-34-46-5-68-60-23-14-12-42-29-22-6-63-9-47-30-15-16-4-39-65-32-13-3-43-20-62-67-17-19-69-57-37-27-44-49-50-18-2-26-24-53-58-33-61-11-64-54-52-51-7-25] | 2 | 1 | 34 |
| AKV70_05 | 2118965.5 | [67-28-44-32-33-13-47-25-45-55-15-66-46-60-11-53-21-12-70-14-56-43-41-26-49-27-16-6-10-22-50-40-51-23-1-9-17-64-69-18-52-57-48-59-42-3-34-29-7-4-36-30-5-20-35-24-61-8-63-65-54-39-37-58-2-31-62-68-38-19] | 2 | 1 | 34 |
| AKV75_01 | 1203557.5 | [47-38-46-9-63-72-51-5-8-33-17-25-11-39-53-3-66-19-20-42-2-24-40-71-6-35-65-23-49-61-56-26-59-52-73-48-14-64-16-29-54-28-13-21-45-22-75-62-43-70-68-4-1-10-31-34-12-74-32-37-55-44-41-7-50-30-15-18-27-36-57-67-69-60-58] | 2 | 1 | 36 |
| AKV75_02 | 2177700.0 | [51-26-43-37-70-66-39-45-59-29-54-73-31-9-17-74-11-13-23-67-3-20-65-75-5-4-24-1-57-18-60-14-28-47-32-25-64-21-2-63-30-40-35-69-41-53-19-48-55-36-68-16-38-27-15-8-62-34-22-71-12-46-52-58-10-33-7-50-42-6-44-72-61-56-49] | 2 | 1 | 34 |
| AKV75_03 | 625858.0 | [10-22-54-41-23-25-18-74-64-2-62-65-44-11-52-67-58-21-9-7-59-3-16-20-48-37-39-72-46-53-43-14-15-42-50-1-19-55-26-60-38-68-61-30-31-12-5-28-45-36-35-75-24-40-32-57-34-73-49-6-13-71-27-56-66-70-4-8-29-17-51-63-33-69-47] | 2 | 1 | 33 |
| AKV75_04 | 1981604.5 | [36-60-14-50-7-10-62-8-30-22-20-40-39-55-12-3-16-28-73-67-45-2-35-48-56-26-23-58-71-4-11-51-27-68-69-49-17-5-15-75-42-37-70-47-57-41-29-33-46-64-65-52-53-44-34-18-24-32-1-13-19-63-66-59-54-43-31-74-61-6-25-38-72-9-21] | 2 | 1 | 35 |
| AKV75_05 | 900411.0 | [27-33-9-19-6-62-40-53-41-39-61-56-67-15-54-57-59-46-29-12-30-17-3-10-49-23-73-32-71-44-1-43-50-52-72-20-26-63-13-2-64-14-16-18-75-69-21-4-48-11-36-34-45-25-55-70-5-28-42-8-38-22-31-66-7-65-74-47-68-58-35-60-51-37-24] | 2 | 1 | 34 |
| AKV80_01 | 1038138.5 | [55-70-60-44-27-40-29-14-43-61-53-12-45-75-49-34-62-66-41-20-10-50-76-9-22-6-33-17-24-73-5-35-8-64-1-71-57-78-2-80-67-65-21-16-46-19-63-39-52-68-47-51-56-54-48-32-58-15-42-36-31-23-74-13-18-37-7-69-72-26-30-59-3-77-38-28-4-79-11-25] | 2 | 1 | 36 |
| AKV80_02 | 967010.0 | [22-11-61-45-49-69-80-78-31-79-70-7-73-59-19-42-44-65-40-9-36-20-3-67-35-25-1-33-29-41-12-74-56-46-14-5-55-24-18-66-48-43-63-51-60-64-52-71-37-30-76-26-68-13-75-62-2-50-8-34-39-38-4-53-6-21-28-23-27-72-77-16-54-47-32-15-58-17-10-57] | 2 | 1 | 37 |
| AKV80_03 | 1634652.0 | [57-63-53-62-61-29-64-35-72-25-76-77-52-8-3-78-27-44-14-23-7-19-75-15-71-60-9-6-28-65-4-42-45-46-43-70-49-68-33-16-74-54-37-26-32-48-30-22-67-10-50-51-39-17-80-21-11-59-41-73-2-18-1-55-66-38-31-12-79-56-24-5-47-13-69-34-36-20-58-40] | 2 | 1 | 39 |
| AKV80_04 | 1877302.0 | [60-69-64-71-78-30-28-42-12-74-9-27-6-18-15-2-72-31-79-52-33-48-53-13-8-65-59-11-45-23-73-34-24-10-44-21-22-56-40-47-75-38-35-54-46-32-66-80-43-76-14-29-62-17-4-67-3-7-16-20-19-26-1-37-77-49-51-70-5-39-68-25-63-55-36-58-57-61-50-41] | 2 | 1 | 38 |
| AKV80_05 | 796686.0 | [17-48-25-58-69-49-42-29-51-14-26-15-56-57-46-63-40-20-4-18-66-71-43-6-54-75-79-30-33-9-19-70-11-74-10-68-73-61-52-7-41-60-78-13-72-12-16-64-28-24-5-50-23-45-80-77-39-59-3-65-55-32-53-35-44-62-34-36-76-31-8-1-22-21-37-67-27-38-47-2] | 2 | 1 | 37 |

**Appendix 3. Best ordering of departments for the corridor allocation problem with a size in the range of [9, 70] and obtained via the IFPA.**

| Instance | Cost | Permutations of the departments | |
| --- | --- | --- | --- |
| [Row 1] | [Row 2] |
| S9 | 1181.5 | [2-6-9-4] | [3-7-5-1-8] |
| S9H | 2294.5 | [5-9-2-4] | [3-7-1-6-8] |
| S10 | 1374.5 | [8-10-1-3] | [6-2-4-5-7-9] |
| S11 | 3439.5 | [11-5-4-1-2] | [8-6-3-10-7-9] |
| Am12a | 1529.0 | [8-9-4-11-12-1] | [5-6-10-2-3-7] |
| Am12b | 1609.5 | [7-12-2-9-4-11] | [3-5-8-6-10-1] |
| Am13a | 2467.5 | [9-5-3-4-8-13] | [10-7-6-11-12-2-1] |
| Am13b | 2870.0 | [12-4-3-5-6-7] | [1-2-13-8-11-9-10] |
| Am15 | 3195.0 | [10-6-3-7-11-2-9] | [15-5-4-14-12-8-13-1] |
| N30_01 | 4115.0 | [2-21-20-4-27-30-8-25-7-13-6-18-1-26-17] | [5-28-29-14-3-16-19-11-9-10-22-23-12-24-15] |
| N30_02 | 10779.5 | [20-27-23-29-19-8-11-25-6-12-24-15] | [3-14-18-5-2-21-4-30-16-28-9-7-22-1-13-10-26-17] |
| N30_03 | 22702.0 | [15-23-12-24-18-10-7-2-16-30-8-3-20] | [5-17-6-26-1-22-13-9-11-25-29-4-19-27-28-21-14] |
| N30_04 | 28401.5 | [28-30-14-4-19-7-5-12-10-23-1-17-15] | [20-27-11-29-25-16-8-3-21-9-2-13-6-22-18-24-26] |
| N30_05 | 57400.0 | [15-1-6-26-5-18-7-10-27-13-21-28-9-14] | [24-12-22-17-23-8-11-19-3-30-2-25-20-16-29-4] |
| ste36_01 | 4966.0 | [35-25-21-33-32-29-19-23-20-12-13-5-15-1-9-3-2] | [24-26-22-34-31-30-28-27-14-11-6-4-7-10-8-18-17-16-36] |
| ste36_02 | 87447.0 | [3-16-7-18-8-1-5-6-11-27-23-19-30-32-34-21-25] | [35-17-15-2-10-9-4-13-12-14-20-28-29-31-33-22-26-24-36] |
| ste36_03 | 50075.5 | [36-18-15-3-1-5-11-20-23-19-30-31-34-33-22-25-24-35] | [17-2-9-16-8-10-7-4-13-12-6-14-27-28-29-32-21-26] |
| ste36_04 | 46794.5 | [33-31-30-32-19-21-25-27-6-12-13-15-1-9-18-3] | [36-34-29-28-22-24-26-23-20-14-11-5-4-7-10-8-2-17-16-35] |
| ste36_05 | 44488.5 | [24-26-22-29-34-19-23-14-6-12-4-7-8-2-18] | [35-25-21-31-30-33-32-28-27-20-11-13-5-1-10-9-3-15-17-16-36] |
| sko42_01 | 12731.0 | [23-6-3-1-38-22-33-39-40-2-15-32-26-31-19-20-34-5-7-29-41] | [16-8-36-24-37-28-21-30-4-14-9-35-18-13-10-27-42-12-17-11-25] |
| sko42_02 | 108006.5 | [8-11-6-25-21-3-16-30-28-12-27-19-18-42-35-31-15-14] | [1-22-24-34-41-7-38-23-36-5-37-29-40-33-20-26-39-32-4-10-9-13-17-2] |
| sko42_03 | 86644.5 | [29-10-42-41-5-12-34-25-35-13-39-23-3-28-14-38-4-33-1-8-22] | [16-19-27-2-11-17-7-20-18-26-30-31-36-6-37-40-24-15-9-21-32] |
| sko42_04 | 68708.0 | [4-9-35-7-17-34-20-11-26-5-30-27-21-3-40-23-24-25-6-8] | [16-33-15-14-41-12-31-13-32-42-10-19-18-2-39-28-38-37-36-1-22-29] |
| sko42_05 | 124017.5 | [6-30-28-36-16-3-37-38-21-25-18-10-42-34-12-29-17-15-9-32] | [23-8-2-5-39-1-24-22-33-27-41-19-7-11-20-35-26-14-31-40-4-13] |
| sko49_01 | 20470.0 | [17-39-21-32-30-5-24-26-11-33-48-23-2-37-3-10-9-38-45-1-42-14-20-28] | [4-44-19-22-8-16-36-25-40-7-49-31-6-43-12-15-34-27-29-35-41-18-13-46-47] |
| sko49_02 | 208068.0 | [2-46-45-12-10-6-27-18-49-1-13-31-26-40-33-8-11-16-32-3-21-42-19-28] | [39-29-37-43-34-9-38-14-41-48-35-47-20-44-24-22-23-4-7-5-17-15-30-36-25] |
| sko49_03 | 162187.0 | [2-46-37-12-27-34-9-18-35-47-44-23-49-22-24-11-16-17-3-21-42-19-28] | [39-29-45-43-10-6-38-14-41-1-48-13-20-31-8-33-26-40-4-7-5-32-15-30-36-25] |
| sko49_04 | 118260.5 | [13-47-9-35-3-27-45-1-46-20-34-6-23-48-5-25-26-4-21-24-49-33-40-17] | [37-14-10-41-15-12-29-38-28-43-42-18-2-31-39-8-11-36-19-16-30-7-32-22-44] |
| sko49_05 | 332836.0 | [17-4-12-19-24-21-26-5-8-3-23-49-48-2-35-18-34-10-13-41-27-38-42] | [22-44-11-36-30-39-25-40-16-32-31-33-7-6-28-46-29-20-15-9-37-45-14-1-43-47] |
| sko56_01 | 31972.0 | [39-3-10-35-18-44-41-14-36-30-33-48-27-5-32-37-7-50-22-56-55-38-6-46-15-54-16-43] | [19-49-40-52-47-13-51-42-9-29-23-17-12-20-28-1-34-11-53-8-24-4-2-45-26-25-21-31] |
| sko56_02 | 248220.0 | [3-2-52-40-28-49-23-18-14-12-39-5-35-32-11-27-53-31-8-20-34-37-24-25-54-26] | [30-44-9-10-42-33-51-47-41-13-56-48-29-36-1-50-55-43-38-22-16-19-45-4-46-7-6-21-17-15] |
| sko56_03 | 85190.0 | [21-32-15-51-50-4-27-34-12-37-7-44-18-35-29-14-24-55-9-2-22-42-54-49] | [16-1-46-48-10-41-17-20-5-39-45-31-25-13-40-52-47-36-53-26-28-3-23-6-38-30-33-11-8-56-19-43] |
| sko56_04 | 156653.0 | [38-3-22-33-23-9-52-13-5-29-7-55-24-28-47-31-20-45-27-39-48-8-2-16-54-1-15] | [35-32-19-49-42-30-40-18-56-44-51-11-10-36-14-50-53-43-6-12-17-26-34-37-46-4-25-21-41] |
| sko56_05 | 296178.5 | [38-26-14-24-15-17-51-22-45-31-34-4-29-37-8-27-50-52-44-40-1-9-2-56-30-3] | [16-41-53-54-25-36-23-21-6-46-43-19-55-35-7-33-47-28-20-5-10-13-39-11-48-12-18-32-49-42] |
| AKV60_05 | 159677.0 | [33-49-52-3-1-43-32-14-23-58-5-24-27-50-28-40-36-35-46-55-13-9-41-4-47-7-37] | [12-44-34-38-11-26-29-57-22-51-18-15-31-45-56-42-21-10-6-25-8-48-60-30-20-17-2-54-19-59-16-53-39] |
| sko64_05 | 250873.5 | [59-15-53-26-19-44-37-57-8-38-34-11-54-45-30-48-28-3-27-31-47-16-43-55-13-10-52-20-49-29-22-9] | [62-25-50-17-2-1-7-32-33-39-41-35-21-56-24-60-40-23-4-51-5-6-42-58-64-14-12-46-61-63-18-36] |
| AKV70_05 | 2109764.5 | [19-1-23-31-40-50-39-16-63-27-8-61-56-24-35-30-12-7-29-60-46-66-59-55-45-25-47-13-33-32-44-67] | [38-9-68-62-51-2-58-37-22-10-6-54-65-49-26-41-43-21-14-20-70-5-36-4-53-11-34-3-42-15-48-57-52-18-69-64-17-28] |
